# Supplementary material for: Nanosilver-Functionalized Hybrid Hydrogels of Carboxymethyl Cellulose/Poly(Vinyl Alcohol) with Antibacterial Activity for Prevention and Therapy of Infections of Diabetic Chronic Wounds
Source: MDPI journal article supplement (doi:10.3390/polym15234542), 2023-11-27
Supplement: s1 [file s1]

## Supporting Information

# Nanosilver Functionalized Hybrid Hydrogels of Carboxymethyl Cellulose/Poly(vinyl alcohol) with Antibacterial Activity for Prevention and Therapy of Infections of Diabetic Chronic Wounds

Nádia S. V. Capanema <sup>1,†</sup>, Alexandra A. P. Mansur <sup>1,†</sup>, Sandhra M. Carvalho <sup>1</sup>, Talita Martins <sup>1</sup>, Maysa S. Gonçalves <sup>2</sup>, Rafaella S. Andrade <sup>2</sup>, Elaine M. S. Dorneles <sup>2</sup>, Letícia C. D. Lima <sup>3</sup>, Érika L. F. C. de Alvarenga <sup>4</sup>, Emanuel V. B. da Fonseca <sup>4</sup>, Marcos Augusto de Sá <sup>3</sup>, Andrey P. Lage <sup>5</sup>, Zelia I. P. Lobato <sup>5</sup>, Herman S. Mansur <sup>1,\*</sup>

<sup>1</sup> Center of Nanoscience, Nanotechnology, and Innovation – CeNano<sup>2</sup>I, Department of Metallurgical and Materials Engineering, Federal University of Minas Gerais, UFMG, Belo Horizonte, Brazil

<sup>2</sup> Departamento de Medicina Veterinária, Universidade Federal de Lavras, UFLA, Lavras, Brazil

<sup>3</sup> Department of Morphology, Institute of Biological Sciences, Federal University of Minas Gerais, UFMG, Belo Horizonte, Brazil

<sup>4</sup> Department of Natural Sciences, Universidade Federal de São João Del-Rei, UFSJ, São João Del-Rei, Brazil

<sup>5</sup> Departamento de Medicina Veterinária Preventiva, Federal University of Minas Gerais, UFMG, Brazil

\* Correspondence: hmansur@demet.ufmg.br

† These authors contributed equally to this work

## Tables

**Table S1.** Results of halo diameters (mm) of disk diffusion test performed according to Clinical & Laboratory Standards Institute (CLSI) using reference strains ( $\bar{x}$ : Average; SD: standard deviation).

| Antimicrobial            | <i>E. faecalis</i><br>ATCC 29212 |     | <i>S. aureus</i><br>ATCC 29213 |     | <i>E. coli</i><br>ATCC 25922 |     | <i>P. aeruginosa</i><br>ATCC 27853 |     |
|--------------------------|----------------------------------|-----|--------------------------------|-----|------------------------------|-----|------------------------------------|-----|
|                          | mm                               |     | Mm                             |     | mm                           |     | mm                                 |     |
|                          | $\bar{x}$                        | SD  | $\bar{x}$                      | SD  | $\bar{x}$                    | SD  | $\bar{x}$                          | SD  |
| Cefotaxime (30 $\mu$ g)  | 31.5                             | 0.5 | 29.5                           | 0.5 | 34.5                         | 1.0 | 21.5                               | 0.5 |
| Norfloxacin (10 $\mu$ g) | 23.5                             | 0.5 | 27.5                           | 0.5 | 31.5                         | 0.5 | 25.0                               | 0.5 |

**Table S2.** Quality control ranges for antimicrobials according to CLSI M100-28th ed. [44].

| Antimicrobial            | <i>E. faecalis</i><br>ATCC 29212 | <i>S. aureus</i><br>ATCC 29213 | <i>E. coli</i><br>ATCC 25922 | <i>P. aeruginosa</i><br>ATCC 27853 |
|--------------------------|----------------------------------|--------------------------------|------------------------------|------------------------------------|
|                          | mm                               | mm                             | mm                           | mm                                 |
|                          |                                  |                                |                              |                                    |
| Cefotaxime (30 $\mu$ g)  | $\geq 26$                        | 25-31                          | 29-35                        | 18-22                              |
| Norfloxacin (10 $\mu$ g) | $\geq 17$                        | 17-28                          | 28-35                        | 22-29                              |
